# Supplementary material for: Route Determination of Sulfur Mustard Using Nontargeted Chemical Attribution Signature Screening
Source: PubMed Central journal article supplement (PMC8041246; doi:10.1021/acs.analchem.0c04555), 2021-03-12
Supplement: ac0c04555_si_001.pdf [file ac0c04555_si_001.pdf]

# SUPPORTING INFORMATION

## **Route determination of sulfur mustard using non-targeted chemical attribution signature screening**

Karin Höjer Holmgren, Lina Mörén, Linnea Ahlinder, Andreas Larsson, Daniel Wiktelius, Rikard Norlin and Crister Åstot\*

[astot@foi.se](mailto:astot@foi.se)

Department of CBRN Defence & Security, The Swedish Defence Research Agency (FOI), Cementvägen 20, Umeå, SE-901 82, Sweden

### ***Table of Contents***

#### **Tables**

|               |    |
|---------------|----|
| Table S1..... | S2 |
| Table S2..... | S2 |
| Table S3..... | S3 |
| Table S4..... | S4 |

#### **Figures**

|                |    |
|----------------|----|
| Figure S1..... | S4 |
| Figure S2..... | S5 |

**Table S1.** Most important variables in M1<sub>crude</sub> models separating ethylene R(10-11) or TDG routes R(1-9) in crude HD samples listed according to retention time.

| ID number              | Peak ID Ret. time and m/z | Classification method | Molecular formula                                                                                  | CAS number  |
|------------------------|---------------------------|-----------------------|----------------------------------------------------------------------------------------------------|-------------|
| M1 <sub>crude</sub> 1  | peak @ 9.05 102.01        | RF                    | C <sub>3</sub> H <sub>6</sub> ClS (T) ( $\Delta=1.0$ )                                             |             |
| M1 <sub>crude</sub> 2  | peak @ 10.36 75.94        | RF                    | Uid                                                                                                |             |
| M1 <sub>crude</sub> 3  | peak @ 9.51 155.96        | RF and OPLS-DA        | C <sub>4</sub> H <sub>6</sub> Cl <sub>2</sub> S (C) #                                              | 873408-12-9 |
| M1 <sub>crude</sub> 4  | peak @ 10.11 119.98       | RF                    | Uid                                                                                                |             |
| M1 <sub>crude</sub> 5  | peak @ 11.76 140.93       | RF and OPLS-DA        | C <sub>4</sub> H <sub>5</sub> Cl <sub>3</sub> S (T) ( $\Delta=0.5$ )                               |             |
| M1 <sub>crude</sub> 6  | peak @ 11.90 118.97       | OPLS-DA               | Uid                                                                                                |             |
| M1 <sub>crude</sub> 7  | peak @ 12.20 157.97       | RF                    | Uid                                                                                                |             |
| M1 <sub>crude</sub> 8  | peak @ 12.38 153.90*      | RF and OPLS-DA        | C <sub>4</sub> H <sub>6</sub> Cl <sub>2</sub> S <sub>2</sub> (T) ( $\Delta=0.04$ )                 |             |
| M1 <sub>crude</sub> 9  | peak @ 12.58 78.99        | RF and OPLS-DA        | C <sub>4</sub> H <sub>5</sub> Cl <sub>3</sub> S (C) #                                              | 153628-01-4 |
| M1 <sub>crude</sub> 10 | peak @ 12.74 78.99        | OPLS-DA               | C <sub>4</sub> H <sub>5</sub> Cl <sub>3</sub> S (C) (stereoisomer) #                               | 153628-01-4 |
| M1 <sub>crude</sub> 11 | peak @ 17.00 180.99       | RF                    | Uid                                                                                                |             |
| M1 <sub>crude</sub> 12 | peak @ 18.33 137.94       | RF and OPLS-DA        | Uid                                                                                                |             |
| M1 <sub>crude</sub> 13 | peak @ 18.51 251.92       | RF and OPLS-DA        | C <sub>6</sub> H <sub>9</sub> Cl <sub>3</sub> S <sub>2</sub> (C) #                                 |             |
| M1 <sub>crude</sub> 14 | peak @ 18.92 183.90       | OPLS-DA               | C <sub>6</sub> H <sub>8</sub> Cl <sub>4</sub> S <sub>2</sub> (C) #                                 |             |
| M1 <sub>crude</sub> 15 | peak @ 19.16 60.00        | RF                    | C <sub>4</sub> H <sub>8</sub> Cl <sub>2</sub> S <sub>4</sub> (C) #                                 | 90586-78-0  |
| M1 <sub>crude</sub> 16 | peak @ 19.47 257.85       | RF and OPLS-DA        | S <sub>8</sub> #                                                                                   | 10544-50-0  |
| M1 <sub>crude</sub> 17 | peak @ 19.65 192.92       | RF and OPLS-DA        | Uid                                                                                                |             |
| M1 <sub>crude</sub> 18 | peak @ 19.65 222.88       | RF and OPLS-DA        | C <sub>6</sub> H <sub>8</sub> S <sub>2</sub> Cl <sub>4</sub> (C) #                                 |             |
| M1 <sub>crude</sub> 19 | peak @ 20.42 182.92       | OPLS-DA               | C <sub>6</sub> H <sub>8</sub> Cl <sub>2</sub> S <sub>3</sub> (T) ( $\Delta=0.1$ )                  |             |
| M1 <sub>crude</sub> 20 | peak @ 20.88 151.95       | OPLS-DA               | C <sub>6</sub> H <sub>9</sub> Cl <sub>3</sub> S <sub>3</sub> (T) ( $\Delta=0.1$ ) #                |             |
| M1 <sub>crude</sub> 21 | peak @ 21.05 283.89       | RF and OPLS-DA        | C <sub>6</sub> H <sub>9</sub> Cl <sub>3</sub> S <sub>3</sub> (T) ( $\Delta=0.1$ ) (stereoisomer) # |             |
| M1 <sub>crude</sub> 22 | peak @ 21.24 207.95       | OPLS-DA               | Uid                                                                                                |             |

\*= found in matrix models, T=tentative molecular formula, calculated by HRMS data, C= molecular formula was confirmed by GC-HRMS, # = compound detected in LR GC-MS<sup>1</sup>, Uid= unidentified compound.  $\Delta$ = ppm deviation of calculated value from theoretical elemental composition.

**Table S2.** The most important variables in M2<sub>crude</sub> models separating the chlorination methods of TDG routes (R(1,4,7), R(2,5,8) and R(3,6,9)) in crude HD samples, listed according to retention time.

| ID number              | Peak ID Ret. time and m/z | Classification method | Correlated to      | Molecular formula                                                                       |
|------------------------|---------------------------|-----------------------|--------------------|-----------------------------------------------------------------------------------------|
| M2 <sub>crude</sub> 1  | peak @ 9.58 68.06         | RF and OPLS-DA        | R(3,6,9)           | C <sub>7</sub> H <sub>13</sub> ClS (C) #                                                |
| M2 <sub>crude</sub> 2  | peak @ 11.57 137.02       | RF and OPLS-DA        | R(1,4,7)           | Uid                                                                                     |
| M2 <sub>crude</sub> 3  | peak @ 11.59 203.92       | RF and OPLS-DA        | R(1,4,7)           | Uid                                                                                     |
| M2 <sub>crude</sub> 4  | peak @ 12.51 91.03        | OPLS-DA               | R(3,6,9)           | Uid                                                                                     |
| M2 <sub>crude</sub> 5  | peak @ 12.62 345.02       | OPLS-DA               | R(2,5,8)           | C <sub>10</sub> H <sub>18</sub> O <sub>7</sub> PS <sub>2</sub> (T) ( $\Delta= -0.1$ ) # |
| M2 <sub>crude</sub> 6  | peak @ 12.65 137.02       | RF and OPLS-DA        | R(3,6,9)           | C <sub>7</sub> H <sub>14</sub> Cl <sub>2</sub> S (C) #                                  |
| M2 <sub>crude</sub> 7  | peak @ 12.85 69.07        | OPLS-DA               | R(3,6,9)           | Uid                                                                                     |
| M2 <sub>crude</sub> 8  | peak @ 13.39 93.96        | RF and OPLS-DA        | R(2,5,8), R(3,6,9) | C <sub>4</sub> H <sub>9</sub> OCIS <sub>2</sub> (T) ( $\Delta= 1.2$ )                   |
| M2 <sub>crude</sub> 9  | peak @ 13.40 212.99       | RF and OPLS-DA        | R(1,4,7)           | Uid                                                                                     |
| M2 <sub>crude</sub> 10 | peak @ 13.43 189.94       | RF and OPLS-DA        | R(2,5,8), R(3,6,9) | C <sub>4</sub> H <sub>8</sub> Cl <sub>2</sub> S <sub>2</sub> (C) #                      |
| M2 <sub>crude</sub> 11 | peak @ 14.04 85.01        | RF and OPLS-DA        | R(2,5,8)           | C <sub>4</sub> H <sub>9</sub> O <sub>3</sub> PS (C) #                                   |
| M2 <sub>crude</sub> 12 | peak @ 14.90 101.04       | OPLS-DA               | R(2,5,8)           | C <sub>5</sub> H <sub>10</sub> O <sub>2</sub> CIPS (T) ( $\Delta= 0.3$ )                |
| M2 <sub>crude</sub> 13 | peak @ 15.66 137.02*      | RF and OPLS-DA        | R(2,5,8)           | C <sub>6</sub> H <sub>9</sub> Cl <sub>3</sub> S (T) ( $\Delta= -0.2$ ) #                |
| M2 <sub>crude</sub> 14 | peak @ 16.99 85.01*       | RF and OPLS-DA        | R(2,5,8)           | C <sub>4</sub> H <sub>9</sub> O <sub>3</sub> PS <sub>2</sub> (C) #                      |
| M2 <sub>crude</sub> 15 | peak @ 20.98 223.89       | OPLS-DA               | R(2,5,8)           | Uid                                                                                     |

\*= found in matrix models, T=tentative molecular formula, calculated by HRMS data, C= molecular formula was confirmed by GC-HRMS, # = compound detected in LR GC-MS<sup>1</sup>, Uid= unidentified compound.  $\Delta$ = ppm deviation of calculated value from theoretical elemental composition.

<sup>1</sup> Holmgren, K. H.; Hok, S.; Magnusson, R.; Larsson, A.; Astot, C.; Koester, C.; Mew, D.; Vu, A. K.; Alcaraz, A.; Williams, A. M.; Norlin, R.; Wikteliu, D., Synthesis route attribution of sulfur mustard by multivariate data analysis of chemical signatures. *Talanta* **2018**, 186, 615-621.

**Table S3.** Most important variables in M3<sub>crude</sub> models separating TDG production methods in crude HD samples, listed according to retention time.

| ID number              | Peak ID Ret. time and m/z | Model          | M3a, M3b or M3c | Molecular formula                                                                 | CAS number |
|------------------------|---------------------------|----------------|-----------------|-----------------------------------------------------------------------------------|------------|
| M3 <sub>crude</sub> 1  | peak @ 5.10 77.98         | RF and OPLS-DA | M3c             |                                                                                   |            |
| M3 <sub>crude</sub> 2  | peak @ 5.16 49.98         | RF and OPLS-DA | M3c             |                                                                                   |            |
| M3 <sub>crude</sub> 3  | peak @ 5.90 104.03        | OPLS-DA        | M3a             |                                                                                   |            |
| M3 <sub>crude</sub> 4  | peak @ 6.40 75.03         | RF and OPLS-DA | M3a             |                                                                                   |            |
| M3 <sub>crude</sub> 5  | peak @ 8.52 43.02         | OPLS-DA        | M3b             |                                                                                   |            |
| M3 <sub>crude</sub> 6  | peak @ 8.71 91.98         | RF and OPLS-DA | M3a, M3c        | C <sub>4</sub> H <sub>8</sub> S <sub>2</sub>                                      | 505-29-3   |
| M3 <sub>crude</sub> 7  | peak @ 8.72 60.00*        | RF and OPLS-DA | M3a             |                                                                                   |            |
| M3 <sub>crude</sub> 8  | peak @ 8.78 200.84        | OPLS-DA        | M3b             |                                                                                   |            |
| M3 <sub>crude</sub> 9  | peak @ 8.96 115.92        | OPLS-DA        | M3a             |                                                                                   |            |
| M3 <sub>crude</sub> 10 | peak @ 9.18 43.02         | OPLS-DA        | M3a, M3b        |                                                                                   |            |
| M3 <sub>crude</sub> 11 | peak @ 9.28 150.03        | OPLS-DA        | M3b             | C <sub>6</sub> H <sub>11</sub> SCl (T) (Δ = 0.7 ppm)                              |            |
| M3 <sub>crude</sub> 12 | peak @ 9.35 127.97        | OPLS-DA        | M3c             | C <sub>4</sub> H <sub>11</sub> O <sub>2</sub> SCl (T) (Δ = 0.9 ppm)               | L          |
| M3 <sub>crude</sub> 13 | peak @ 10.04 137.02       | OPLS-DA        | M3c             |                                                                                   |            |
| M3 <sub>crude</sub> 14 | peak @ 10.32 46.98        | RF and OPLS-DA | M3b             |                                                                                   |            |
| M3 <sub>crude</sub> 15 | peak @ 10.36 44.03        | RF and OPLS-DA | M3a, M3c        |                                                                                   |            |
| M3 <sub>crude</sub> 16 | peak @ 10.64 127.95*      | RF and OPLS-DA | M3a, M3b, M3c   | C <sub>5</sub> H <sub>11</sub> S <sub>2</sub> Cl (T) (Δ = 0.2 ppm)                |            |
| M3 <sub>crude</sub> 17 | peak @ 10.80 41.04        | RF and OPLS-DA | M3a             |                                                                                   |            |
| M3 <sub>crude</sub> 18 | peak @ 11.53 120.01       | RF             | M3b             |                                                                                   |            |
| M3 <sub>crude</sub> 19 | peak @ 11.63 71.05        | OPLS-DA        | M3b             |                                                                                   |            |
| M3 <sub>crude</sub> 20 | peak @ 12.03 193.93       | OPLS-DA        | M3a, M3b        |                                                                                   |            |
| M3 <sub>crude</sub> 21 | peak @ 12.64 67.05        | RF             | M3c             |                                                                                   |            |
| M3 <sub>crude</sub> 22 | peak @ 12.67 202.02       | RF             | M3c             |                                                                                   |            |
| M3 <sub>crude</sub> 23 | peak @ 13.16 156.03       | RF and OPLS-DA | M3c             |                                                                                   |            |
| M3 <sub>crude</sub> 24 | peak @ 13.18 155.03       | RF and OPLS-DA | M3a, M3c        |                                                                                   |            |
| M3 <sub>crude</sub> 25 | peak @ 13.39 93.96        | RF             | M3a             |                                                                                   |            |
| M3 <sub>crude</sub> 26 | peak @ 13.40 59.00        | RF             | M3a, M3c        |                                                                                   |            |
| M3 <sub>crude</sub> 27 | peak @ 13.43 189.94       | RF             | M3c             |                                                                                   |            |
| M3 <sub>crude</sub> 28 | peak @ 13.53 193.96       | OPLS-DA        | M3c             |                                                                                   |            |
| M3 <sub>crude</sub> 29 | peak @ 13.54 140.98       | OPLS-DA        | M3b             |                                                                                   |            |
| M3 <sub>crude</sub> 30 | peak @ 13.55 186.00       | OPLS-DA        | M3c             | C <sub>6</sub> H <sub>12</sub> SCl <sub>2</sub> (T) (Δ = 0.3 ppm)                 | L          |
| M3 <sub>crude</sub> 31 | peak @ 13.63 171.98       | RF             | M3b             |                                                                                   |            |
| M3 <sub>crude</sub> 32 | peak @ 14.19 170.98       | OPLS-DA        | M3a             |                                                                                   |            |
| M3 <sub>crude</sub> 33 | peak @ 14.49 184.96       | OPLS-DA        | M3c             |                                                                                   |            |
| M3 <sub>crude</sub> 34 | peak @ 14.57 145.04*      | OPLS-DA        | M3a             |                                                                                   |            |
| M3 <sub>crude</sub> 35 | peak @ 14.72 205.16       | RF and OPLS-DA | M3a, M3b, M3c   |                                                                                   |            |
| M3 <sub>crude</sub> 36 | peak @ 14.75 184.96       | OPLS-DA        | M3c             |                                                                                   |            |
| M3 <sub>crude</sub> 37 | peak @ 14.80 43.02        | RF and OPLS-DA | M3b, M3c        |                                                                                   |            |
| M3 <sub>crude</sub> 38 | peak @ 14.84 69.07        | RF and OPLS-DA | M3a, M3b        |                                                                                   |            |
| M3 <sub>crude</sub> 39 | peak @ 15.05 86.02        | OPLS-DA        | M3b             |                                                                                   |            |
| M3 <sub>crude</sub> 40 | peak @ 15.41 89.01        | OPLS-DA        | M3b             |                                                                                   |            |
| M3 <sub>crude</sub> 41 | peak @ 15.52 105.99       | OPLS-DA        | M3b             | C <sub>5</sub> H <sub>10</sub> S <sub>2</sub> Cl <sub>2</sub> (T) (Δ = - 0.3 ppm) | 63869-13-6 |
| M3 <sub>crude</sub> 42 | peak @ 15.54 240.01       | OPLS-DA        | M3c             |                                                                                   |            |
| M3 <sub>crude</sub> 43 | peak @ 15.59 41.04        | RF             | M3b             |                                                                                   |            |
| M3 <sub>crude</sub> 44 | peak @ 16.39 91.03*       | OPLS-DA        | M3a, M3c        |                                                                                   |            |
| M3 <sub>crude</sub> 45 | peak @ 16.81 60.00        | OPLS-DA        | M3b             |                                                                                   |            |
| M3 <sub>crude</sub> 46 | peak @ 16.92 91.03        | OPLS-DA        | M3a             |                                                                                   |            |
| M3 <sub>crude</sub> 47 | peak @ 16.99 122.00       | OPLS-DA        | M3b             |                                                                                   |            |
| M3 <sub>crude</sub> 48 | peak @ 17.01 123.00       | RF             | M3b             |                                                                                   |            |
| M3 <sub>crude</sub> 49 | peak @ 17.23 215.96       | RF and OPLS-DA | M3b             | C <sub>6</sub> H <sub>10</sub> S <sub>2</sub> Cl <sub>2</sub> (T) (Δ = 1.1 ppm)   |            |
| M3 <sub>crude</sub> 50 | peak @ 17.43 116.98       | OPLS-DA        | M3b             |                                                                                   |            |
| M3 <sub>crude</sub> 51 | peak @ 18.10 69.07.1      | RF             | M3a             |                                                                                   |            |
| M3 <sub>crude</sub> 52 | peak @ 18.37 243.06       | RF and OPLS-DA | M3a             | C <sub>13</sub> H <sub>19</sub> OSCl (T) (Δ = 0.6 ppm)                            |            |
| M3 <sub>crude</sub> 53 | peak @ 19.24 199.11       | OPLS-DA        | M3a             |                                                                                   |            |
| M3 <sub>crude</sub> 54 | peak @ 19.51 123.00       | OPLS-DA        | M3c             |                                                                                   |            |

\*= found in matrix models, T=tentative molecular formula, calculated by HRMS data. Δ= ppm deviation of calculated value from theoretical elemental composition.

**Table S4.** Most important variables in RF and OPLS-DA  $M2_{matrix}$  models separating chlorination methods.

| ID number        | Peak ID Ret. time and m/z | Correlated to | Best match of molecular formula of fragment                           |
|------------------|---------------------------|---------------|-----------------------------------------------------------------------|
| $M2_{matrix}$ 1  | peak @ 13.29 139.97       | R(2,5,8)      | $C_2H_5O_3PS$ ( $\Delta = -1.1$ )/ $C_3H_5O_2ClS$ ( $\Delta = -2.4$ ) |
| $M2_{matrix}$ 2  | peak @ 20.85 166.99       | R(2,5,8)      | $C_4H_8O_3PS$ ( $\Delta = 0.3$ )                                      |
| $M2_{matrix}$ 3  | peak @ 17.29 137.02       | R(2,5,8)      | $C_5H_{10}ClS$ ( $\Delta = 0.3$ )                                     |
| $M2_{matrix}$ 4  | peak @ 15.31 105.05       | R(3,6,9)      | $C_5H_{10}Cl$ ( $\Delta = 0.4$ )                                      |
| $M2_{matrix}$ 5  | peak @ 13.63 140.98       | R(2,5,8)      | $C_3H_6O_2ClS$ ( $\Delta = 0.3$ )/ $C_2H_6O_3PS$ ( $\Delta = 1.6$ )   |
| $M2_{matrix}$ 6  | peak @ 18.01 159.92       | R(3,6,9)      | $C_2H_5ClS_3$ ( $\Delta = -0.9$ )                                     |
| $M2_{matrix}$ 7  | peak @ 15.60 123.00       | R(2,5,8)      | $C_4H_8ClS$ ( $\Delta = 0.2$ )                                        |
| $M2_{matrix}$ 8  | peak @ 16.73 215.96       | R(2,5,8)      | $C_6H_{10}Cl_2S_2$ ( $\Delta = 1.2$ )                                 |
| $M2_{matrix}$ 9  | peak @ 15.45 105.05       | R(3,6,9)      | $C_5H_{10}Cl$ ( $\Delta = 0.5$ )                                      |
| $M2_{matrix}$ 10 | peak @ 5.43 60.00         | R(2,5,8)      | $C_2H_4S$ ( $\Delta = -1.0$ )                                         |
| $M2_{matrix}$ 11 | peak @ 16.36 123.95       | R(1,4,7)      | $C_2H_4S_3$ ( $\Delta = 2.7$ )                                        |
| $M2_{matrix}$ 12 | peak @ 17.06 85.01        | R(2,5,8)      | $C_4H_5S$ ( $\Delta = 0.6$ )                                          |

$\Delta =$  ppm deviation of calculated value from theoretical elemental composition.

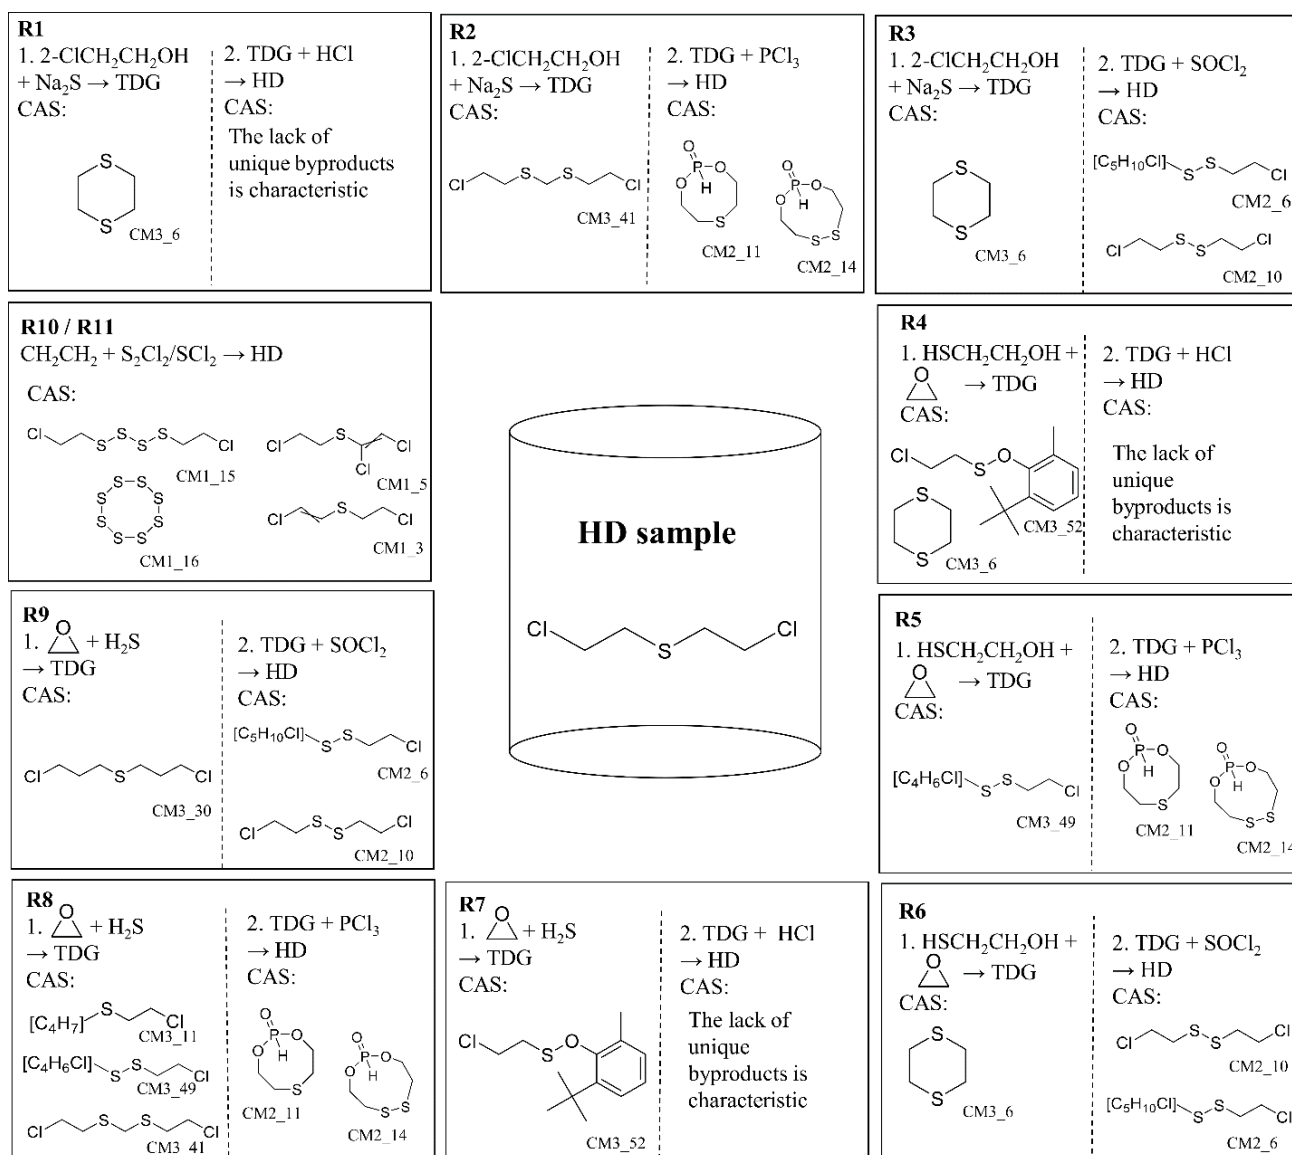

**Figure S1.** HD synthesis descriptions and representative CAS.

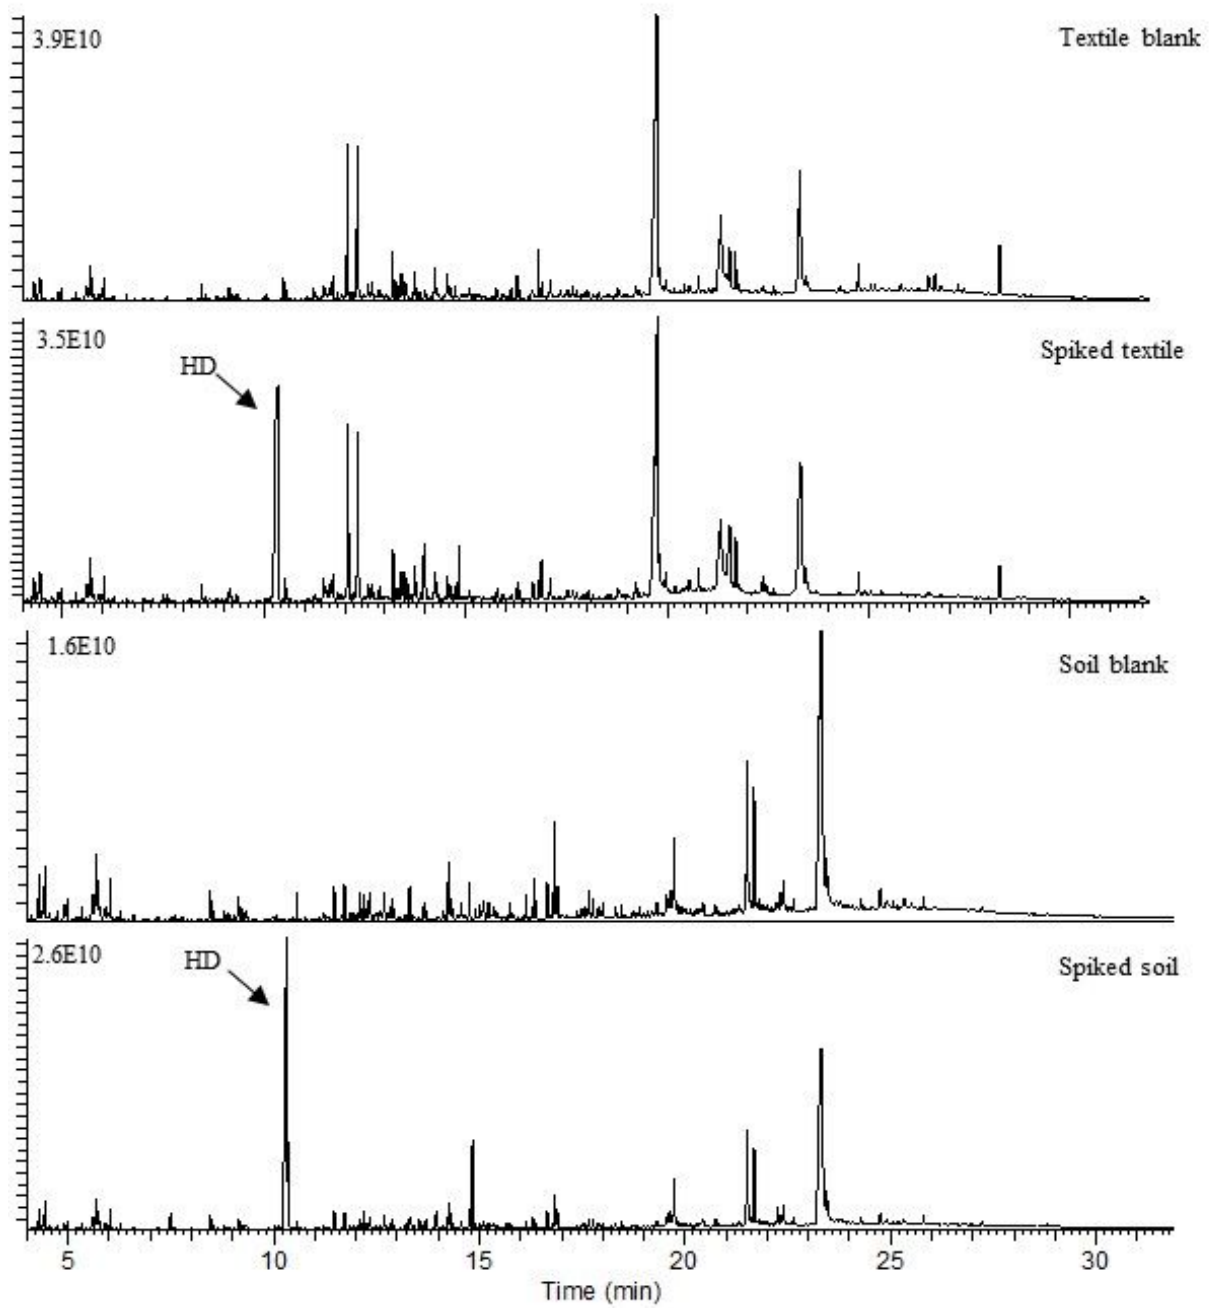

**Figure S2.** Total ion chromatogram of blank matrix samples and spiked (R8) matrix samples. The HD (\*) peak is seen at a retention time of 10.1 minutes.
